# Supplementary material for: Profiling and integrated analysis of transcriptional addiction gene expression and prognostic value in hepatocellular carcinoma
Source: publisher site journal article supplement (doi:10.18632/aging.204676), 2023-04-22
Supplement: Supplementary file [file aging-v15i8-204676-supplementary-material-SD1.pdf]

**SUPPLEMENTARY FIGURE**

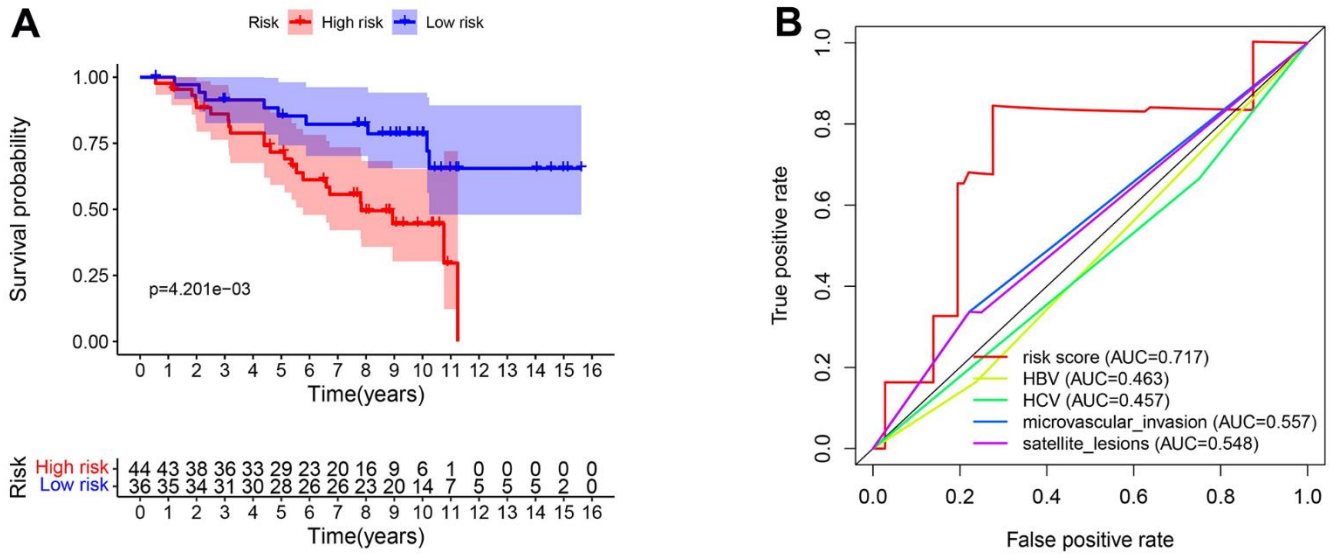

**Supplementary Figure 1. Predicting patient survival for the transcriptional addiction gene signature in GEO-GSE20140 set.** (A) Survival analysis of risk groups based on 80 patients. (B) The time-dependent ROC curve of the risk score and clinicopathological characteristics.
