# Supplementary material for: Profiling and integrated analysis of transcriptional addiction gene expression and prognostic value in hepatocellular carcinoma
Source: Aging (Albany NY). 2023 Apr 22;15(8):3141–57. doi: 10.18632/aging.204676 (PMC10188332; doi:10.18632/aging.204676)
Supplement: Supplementary Table 1 [file aging-15-204676-s002.xlsx]

## Sheet: TCGA
Supplementary Table 1. Specific clinical information in each set.
id	futime	fustat	Age	Gender	Grade	Stage
TCGA-2Y-A9GU	4.44932	1	55	Female	G2	Stage I
TCGA-2Y-A9GT	5.31233	0	51	Male	G2	Stage I
TCGA-2Y-A9GV	6.93699	1	54	Female	G1	Stage I
TCGA-2Y-A9GW	3.48219	1	64	Male	G2	Stage I
TCGA-2Y-A9GX	6.69041	0	68	Male	G2	Stage I
TCGA-2Y-A9GY	2.07397	1	64	Female	G3	Stage II
TCGA-2Y-A9GZ	2.32329	1	82	Female	G2	Stage II
TCGA-2Y-A9H0	10.0685	0	49	Male	G1	Stage III
TCGA-2Y-A9H1	3.36712	1	58	Male	G2	Stage I
TCGA-2Y-A9H2	4.74247	0	64	Female	G3	Stage I
TCGA-2Y-A9H3	4.15342	0	45	Male	G1	Stage II
TCGA-2Y-A9H4	3.97808	0	68	Male	G2	Stage I
TCGA-2Y-A9H5	1.52055	1	59	Female	G3	Stage I
TCGA-2Y-A9H6	0.978082	0	68	Female	G2	Stage I
TCGA-2Y-A9H7	3.2	0	81	Female	G2	Stage I
TCGA-2Y-A9H9	1.90959	0	70	Male	G2	Stage I
TCGA-2Y-A9HA	0.0986301	1	70	Male	G2	Stage II
TCGA-2Y-A9HB	0.712329	0	66	Male	G2	Stage I
TCGA-3K-AAZ8	1.08493	0	65	Male	G1	Stage III
TCGA-4R-AA8I	0.717808	1	66	Male	G2	Stage II
TCGA-5C-A9VG	0.89863	0	58	Male	G2	Stage II
TCGA-5C-A9VH	0.882192	0	70	Male	G2	Stage I
TCGA-5R-AA1C	1.42466	0	57	Male	G2	Stage II
TCGA-5R-AA1D	1.23014	0	17	Female	G3	Stage III
TCGA-5R-AAAM	0.126027	1	65	Female	G2	Stage II
TCGA-BC-A10X	2.10959	1	52	Female	G2	Stage III
TCGA-BC-A10Z	0.0931507	1	62	Female	G2	Stage I
TCGA-BC-A216	3.70137	0	62	Female	G2	Stage III
TCGA-BC-A217	3.8274	1	75	Female	G3	Stage II
TCGA-BC-A3KF	0.0219178	0	66	Female	G2	Stage I
TCGA-BC-A3KG	1.86301	0	68	Female	G3	Stage II
TCGA-BC-A5W4	1.49863	1	69	Male	G3	Stage III
TCGA-BC-A69H	1.21644	0	64	Male	G3	Stage II
TCGA-BC-A69I	1.06027	0	69	Male	G1	Stage I
TCGA-BC-A8YO	1.53973	0	66	Female	G3	Stage III
TCGA-BD-A3EP	1.12055	0	75	Female	G2	Stage I
TCGA-BD-A3ER	3.05479	0	62	Male	G2	Stage II
TCGA-BW-A5NO	0.0547945	0	50	Male	G2	Stage III
TCGA-CC-5258	0.353425	1	48	Male	G2	Stage II
TCGA-CC-5259	0.684932	0	60	Female	G2	Stage III
TCGA-CC-5260	0.238356	1	61	Female	G1	Stage III
TCGA-CC-5261	0.265753	1	44	Male	G2	Stage II
TCGA-CC-5262	0.282192	1	67	Male	G1	Stage III
TCGA-CC-5263	0.353425	1	35	Male	G1	Stage III
TCGA-CC-5264	0.279452	1	71	Male	G2	Stage III
TCGA-CC-A123	0.6	0	24	Female	G1	Stage III
TCGA-CC-A1HT	0.276712	1	50	Male	G3	Stage III
TCGA-CC-A3M9	0.821918	1	45	Male	G3	Stage III
TCGA-CC-A3MA	0.830137	1	61	Male	G2	Stage III
TCGA-CC-A3MB	0.863014	1	36	Male	G1	Stage III
TCGA-CC-A3MC	0.994521	0	54	Male	G2	Stage III
TCGA-CC-A5UC	0.950685	1	63	Male	G3	Stage III
TCGA-CC-A5UD	0.832877	1	45	Male	G2	Stage III
TCGA-CC-A5UE	0.745205	1	48	Male	G2	Stage III
TCGA-CC-A7IE	0.594521	1	57	Male	G2	Stage III
TCGA-CC-A7IF	1.77808	1	59	Male	G1	Stage III
TCGA-CC-A7IG	0.819178	1	47	Male	G2	Stage II
TCGA-CC-A7IH	1	0	58	Male	G1	Stage III
TCGA-CC-A7II	1.09315	0	54	Male	G3	Stage III
TCGA-CC-A7IJ	1.04658	0	56	Male	G3	Stage II
TCGA-CC-A7IK	0.717808	1	59	Male	G3	Stage III
TCGA-CC-A7IL	0.761644	1	61	Male	G1	Stage III
TCGA-CC-A8HS	0.821918	1	18	Male	G1	Stage III
TCGA-CC-A8HT	0.383562	1	74	Male	G2	Stage III
TCGA-CC-A8HU	0.942466	1	39	Female	G3	Stage III
TCGA-CC-A8HV	0.764384	1	51	Female	G2	Stage II
TCGA-CC-A9FS	0.578082	0	55	Male	G2	Stage II
TCGA-CC-A9FW	0.679452	0	68	Male	G2	Stage III
TCGA-DD-A113	6.64384	0	55	Female	G3	Stage II
TCGA-DD-A114	3.14795	1	42	Male	G3	Stage II
TCGA-DD-A115	6.96438	1	53	Male	G2	Stage III
TCGA-DD-A116	4.44384	1	68	Male	G3	Stage III
TCGA-DD-A118	9.41644	0	77	Female	G2	Stage II
TCGA-DD-A119	0.610959	1	40	Male	G3	Stage IV
TCGA-DD-A11A	0.216438	0	67	Male	G3	Stage I
TCGA-DD-A11B	0.0383562	1	73	Male	G2	Stage I
TCGA-DD-A11C	1.8137	0	69	Male	G3	Stage I
TCGA-DD-A11D	4.27397	1	57	Female	G2	Stage I
TCGA-DD-A1EA	6.61644	0	68	Male	G2	Stage II
TCGA-DD-A1EB	5.52603	0	72	Female	G2	Stage I
TCGA-DD-A1EC	1.64932	0	20	Female	G3	Stage I
TCGA-DD-A1ED	6.30411	0	68	Male	G1	Stage I
TCGA-DD-A1EE	0.956164	1	73	Male	G3	Stage III
TCGA-DD-A1EF	1.07945	1	57	Female	G3	Stage I
TCGA-DD-A1EG	3.7589	1	76	Male	G3	Stage I
TCGA-DD-A1EH	4.09589	0	23	Male	G3	Stage III
TCGA-DD-A1EI	0.50137	0	46	Male	G2	Stage I
TCGA-DD-A1EJ	2.75342	1	71	Female	G2	Stage III
TCGA-DD-A1EK	1.52877	1	64	Female	G2	Stage IV
TCGA-DD-A1EL	1.13699	1	23	Male	G3	Stage II
TCGA-DD-A39V	1.76164	1	77	Male	G3	Stage II
TCGA-DD-A39W	2.26575	1	29	Female	G2	Stage III
TCGA-DD-A39X	4.6411	1	78	Female	G2	Stage I
TCGA-DD-A39Y	0.468493	1	67	Male	G3	Stage I
TCGA-DD-A39Z	1.64658	1	43	Female	G2	Stage II
TCGA-DD-A3A1	0.638356	1	65	Male	G2	Stage III
TCGA-DD-A3A2	5.83836	1	76	Female	G1	Stage I
TCGA-DD-A3A3	1.46575	1	45	Male	G2	Stage I
TCGA-DD-A3A4	1.67671	1	37	Male	G3	Stage III
TCGA-DD-A3A5	8.56164	1	66	Female	G2	Stage III
TCGA-DD-A3A6	8.92603	1	72	Female	G2	Stage II
TCGA-DD-A3A7	1.14795	1	67	Male	G3	Stage III
TCGA-DD-A3A8	0.030137	1	75	Male	G2	Stage II
TCGA-DD-A3A9	2.55068	1	64	Female	G2	Stage IV
TCGA-DD-A4NA	2.76164	0	67	Female	G3	Stage III
TCGA-DD-A4NB	2.70959	0	25	Male	G2	Stage I
TCGA-DD-A4ND	7.52329	0	56	Female	G3	Stage I
TCGA-DD-A4NE	1.80822	1	75	Female	G3	Stage III
TCGA-DD-A4NF	2.58082	0	72	Male	G2	Stage I
TCGA-DD-A4NG	2.19726	1	77	Male	G2	Stage III
TCGA-DD-A4NH	2.51233	0	65	Female	G3	Stage III
TCGA-DD-A4NI	2.23562	0	67	Male	G2	Stage II
TCGA-DD-A4NL	4.68767	0	46	Male	G1	Stage I
TCGA-DD-A4NN	2.46301	1	56	Female	G3	Stage I
TCGA-DD-A4NO	6.15068	0	65	Male	G1	Stage I
TCGA-DD-A4NP	9.06301	0	32	Male	G3	Stage I
TCGA-DD-A4NQ	1.02192	1	60	Male	G3	Stage II
TCGA-DD-A4NR	0.0246575	1	85	Female	G3	Stage I
TCGA-DD-A4NS	6.72877	1	61	Female	G2	Stage I
TCGA-DD-A4NV	6.56986	0	61	Male	G1	Stage III
TCGA-DD-A73A	1.99452	0	71	Male	G2	Stage I
TCGA-DD-A73B	0.775342	1	72	Female	G2	Stage I
TCGA-DD-A73C	1.92055	0	65	Female	G1	Stage III
TCGA-DD-A73D	1.89863	0	68	Female	G1	Stage II
TCGA-DD-A73E	0.120548	0	66	Male	G1	Stage I
TCGA-DD-A73F	2.9726	0	77	Female	G1	Stage I
TCGA-DD-A73G	9.52877	0	73	Female	G3	Stage I
TCGA-DD-AAC8	0.0438356	1	72	Male	G3	Stage I
TCGA-DD-AAC9	0.950685	0	51	Male	G2	Stage I
TCGA-DD-AACA	6.30411	0	65	Male	G3	Stage I
TCGA-DD-AACB	6.36712	0	74	Female	G3	Stage I
TCGA-DD-AACC	4.61644	1	61	Male	G2	Stage I
TCGA-DD-AACD	1.04384	1	48	Male	G4	Stage I
TCGA-DD-AACE	5.98356	0	62	Male	G3	Stage I
TCGA-DD-AACF	1	1	68	Male	G3	Stage I
TCGA-DD-AACG	1.28493	1	52	Male	G4	Stage II
TCGA-DD-AACH	0.534247	1	69	Male	G3	Stage II
TCGA-DD-AACI	4.43288	0	69	Male	G3	Stage II
TCGA-DD-AACJ	5.7589	0	75	Male	G2	Stage II
TCGA-DD-AACK	0.0246575	0	70	Male	G2	Stage I
TCGA-DD-AACL	0.293151	1	66	Female	G3	Stage I
TCGA-DD-AACN	3.56712	0	32	Male	G3	Stage I
TCGA-DD-AACO	5.13973	0	40	Male	G3	Stage I
TCGA-DD-AACP	1.13699	0	64	Male	G3	Stage I
TCGA-DD-AACQ	1.18356	1	50	Male	G3	Stage II
TCGA-DD-AACS	4.94247	0	39	Male	G3	Stage I
TCGA-DD-AACT	4.27945	0	69	Female	G2	Stage I
TCGA-DD-AACU	4.29315	0	59	Male	G3	Stage I
TCGA-DD-AACV	4.19452	0	53	Male	G3	Stage I
TCGA-DD-AACW	3.90137	0	43	Male	G3	Stage I
TCGA-DD-AACX	0.465753	0	66	Male	G3	Stage II
TCGA-DD-AACY	3.9726	0	61	Male	G3	Stage I
TCGA-DD-AACZ	0.468493	1	63	Female	G4	Stage I
TCGA-DD-AAD0	0.375342	0	73	Female	G2	Stage I
TCGA-DD-AAD1	1.54521	0	51	Female	G4	Stage I
TCGA-DD-AAD2	1.80274	0	66	Male	G2	Stage I
TCGA-DD-AAD3	3.54795	0	43	Male	G2	Stage I
TCGA-DD-AAD5	3.68493	0	54	Male	G3	Stage I
TCGA-DD-AAD6	1.8411	0	66	Male	G3	Stage III
TCGA-DD-AAD8	3.33973	0	73	Female	G2	Stage I
TCGA-DD-AADA	3.37808	0	66	Female	G3	Stage I
TCGA-DD-AADB	3.40274	0	51	Male	G4	Stage I
TCGA-DD-AADC	1.16438	1	53	Male	G3	Stage I
TCGA-DD-AADD	3.3726	0	51	Male	G4	Stage I
TCGA-DD-AADF	0.315068	1	64	Female	G4	Stage I
TCGA-DD-AADG	3.13699	0	70	Male	G3	Stage III
TCGA-DD-AADI	2.9726	0	43	Female	G3	Stage I
TCGA-DD-AADJ	2.92055	0	70	Female	G3	Stage I
TCGA-DD-AADK	2.87397	0	68	Female	G3	Stage II
TCGA-DD-AADL	1.74247	0	58	Male	G4	Stage I
TCGA-DD-AADM	0.0328767	1	58	Male	G3	Stage II
TCGA-DD-AADN	2.46027	0	59	Male	G4	Stage I
TCGA-DD-AADO	1.2411	0	55	Male	G3	Stage I
TCGA-DD-AADP	1.25479	0	45	Male	G3	Stage I
TCGA-DD-AADQ	1.19452	0	59	Male	G3	Stage II
TCGA-DD-AADR	5.55616	0	58	Male	G3	Stage I
TCGA-DD-AADS	1.29863	0	63	Male	G2	Stage I
TCGA-DD-AADU	1.51781	0	60	Male	G3	Stage II
TCGA-DD-AADV	1.5726	0	50	Male	G3	Stage I
TCGA-DD-AADW	1.60822	0	48	Male	G3	Stage I
TCGA-DD-AADY	1.52055	0	55	Female	G2	Stage I
TCGA-DD-AAE0	1.52055	0	45	Female	G4	Stage III
TCGA-DD-AAE1	1.51233	0	52	Male	G3	Stage I
TCGA-DD-AAE2	1.74795	0	51	Male	G3	Stage I
TCGA-DD-AAE3	1.55068	0	50	Male	G2	Stage I
TCGA-DD-AAE4	1.66575	0	49	Female	G1	Stage I
TCGA-DD-AAE6	0.386301	0	59	Female	G2	Stage I
TCGA-DD-AAE7	1.76438	0	72	Male	G2	Stage I
TCGA-DD-AAE9	1.97808	0	69	Male	G3	Stage I
TCGA-DD-AAEA	1.57534	0	65	Male	G3	Stage I
TCGA-DD-AAEB	1.30959	0	60	Male	G2	Stage I
TCGA-DD-AAED	2.09041	0	51	Male	G3	Stage I
TCGA-DD-AAEE	2.21918	0	55	Male	G4	Stage I
TCGA-DD-AAEG	1.96986	0	59	Female	G3	Stage I
TCGA-DD-AAEH	2.14795	0	73	Male	G2	Stage I
TCGA-DD-AAEI	4.19452	0	72	Male	G2	Stage I
TCGA-DD-AAEK	2.92329	0	51	Male	G3	Stage II
TCGA-DD-AAVP	7.53973	0	48	Male	G1	Stage I
TCGA-DD-AAVQ	7.47397	0	38	Male	G2	Stage I
TCGA-DD-AAVR	6.88493	0	44	Male	G2	Stage I
TCGA-DD-AAVS	4.99452	0	56	Male	G2	Stage I
TCGA-DD-AAVU	6.03288	0	46	Male	G2	Stage II
TCGA-DD-AAVV	6.72603	0	56	Male	G3	Stage II
TCGA-DD-AAVW	6.34795	0	35	Male	G2	Stage I
TCGA-DD-AAVX	4.70685	0	38	Male	G2	Stage II
TCGA-DD-AAVY	5.39726	0	56	Male	G2	Stage III
TCGA-DD-AAVZ	5.20548	0	38	Male	G2	Stage I
TCGA-DD-AAW0	5.52055	0	54	Male	G2	Stage I
TCGA-DD-AAW1	5.44932	0	55	Male	G2	Stage III
TCGA-DD-AAW2	5.08219	0	69	Male	G2	Stage I
TCGA-DD-AAW3	4.47397	0	69	Male	G2	Stage I
TCGA-ED-A459	2.49315	0	47	Male	G2	Stage II
TCGA-ED-A4XI	2.24384	0	58	Male	G3	Stage II
TCGA-ED-A5KG	2.33973	0	60	Female	G2	Stage II
TCGA-ED-A627	1.1589	0	74	Male	G2	Stage I
TCGA-ED-A66X	1.11233	0	35	Male	G3	Stage III
TCGA-ED-A66Y	0.810959	1	51	Female	G3	Stage III
TCGA-ED-A7PX	0.0164384	0	48	Female	G3	Stage II
TCGA-ED-A7PY	1.06849	0	20	Female	G3	Stage II
TCGA-ED-A7PZ	0.0164384	0	61	Male	G2	Stage II
TCGA-ED-A7XO	1.16986	0	29	Male	G2	Stage III
TCGA-ED-A7XP	1.09589	0	53	Female	G3	Stage II
TCGA-ED-A82E	1.11781	0	60	Female	G2	Stage III
TCGA-ED-A8O5	1.11233	0	59	Female	G3	Stage III
TCGA-ED-A8O6	0.153425	1	50	Female	G3	Stage III
TCGA-EP-A12J	1.56164	0	62	Male	G1	Stage I
TCGA-EP-A26S	1.66575	0	70	Male	G2	Stage I
TCGA-EP-A2KA	1.71781	1	52	Female	G3	Stage III
TCGA-EP-A2KB	1.63288	1	46	Female	G2	Stage I
TCGA-EP-A2KC	0.0520548	1	62	Male	G3	Stage I
TCGA-EP-A3JL	0.830137	0	76	Male	G2	Stage I
TCGA-EP-A3RK	0.994521	0	73	Male	G2	Stage III
TCGA-ES-A2HS	1.88493	1	80	Male	G2	Stage I
TCGA-ES-A2HT	1.2	1	54	Male	G2	Stage I
TCGA-FV-A2QQ	1.99726	0	80	Male	G2	Stage I
TCGA-FV-A2QR	1.59178	1	75	Male	G1	Stage I
TCGA-FV-A3I1	0.676712	1	81	Female	G2	Stage II
TCGA-FV-A495	0.00273973	0	51	Female	G2	Stage II
TCGA-FV-A496	0.0273973	0	84	Female	G2	Stage I
TCGA-FV-A4ZP	6.81096	1	78	Male	G2	Stage III
TCGA-FV-A4ZQ	0.0328767	0	52	Male	G2	Stage I
TCGA-G3-A25S	1.13973	1	64	Male	G2	Stage I
TCGA-G3-A25T	4.25479	0	45	Female	G2	Stage III
TCGA-G3-A25U	4.48219	0	63	Female	G3	Stage I
TCGA-G3-A25V	2.35616	0	68	Male	G2	Stage I
TCGA-G3-A25X	4.87397	0	73	Male	G3	Stage II
TCGA-G3-A25Y	1.23836	1	52	Female	G3	Stage I
TCGA-G3-A25Z	1.79452	0	58	Male	G2	Stage I
TCGA-G3-A3CG	1.84384	0	80	Male	G2	Stage I
TCGA-G3-A3CH	2.13699	0	53	Male	G2	Stage III
TCGA-G3-A3CI	0.493151	0	71	Male	G2	Stage I
TCGA-G3-A3CJ	1.6274	0	52	Male	G2	Stage II
TCGA-G3-A3CK	1.60274	0	61	Male	G2	Stage I
TCGA-G3-A5SI	2.10411	1	44	Male	G2	Stage II
TCGA-G3-A5SJ	1.91233	0	59	Male	G2	Stage I
TCGA-G3-A5SK	2.03836	0	58	Male	G1	Stage I
TCGA-G3-A5SL	1.70137	0	70	Male	G2	Stage II
TCGA-G3-A5SM	1.42466	0	58	Male	G3	Stage II
TCGA-G3-A6UC	1.83836	0	65	Male	G2	Stage III
TCGA-G3-A7M5	1.22466	0	76	Male	G2	Stage I
TCGA-G3-A7M6	1.73151	0	60	Female	G3	Stage I
TCGA-G3-A7M7	0.989041	0	65	Male	G1	Stage I
TCGA-G3-A7M8	1.17808	0	31	Male	G1	Stage I
TCGA-G3-A7M9	0.153425	1	70	Male	G2	Stage III
TCGA-G3-AAUZ	1.31507	0	48	Male	G2	Stage I
TCGA-G3-AAV0	1.30411	0	58	Male	G2	Stage I
TCGA-G3-AAV1	0.983562	1	51	Male	G3	Stage III
TCGA-G3-AAV2	1.01918	0	50	Male	G1	Stage I
TCGA-G3-AAV3	1.12877	0	58	Female	G2	Stage II
TCGA-G3-AAV4	0.0739726	1	83	Female	G1	Stage I
TCGA-G3-AAV5	0.969863	0	67	Male	G2	Stage II
TCGA-G3-AAV6	0.178082	1	53	Female	G3	Stage III
TCGA-G3-AAV7	0.989041	0	38	Male	G2	Stage II
TCGA-GJ-A3OU	2.40822	0	59	Male	G2	Stage I
TCGA-GJ-A6C0	0.0849315	1	75	Female	G2	Stage II
TCGA-GJ-A9DB	0.183562	1	68	Male	G2	Stage I
TCGA-HP-A5MZ	0.249315	1	78	Male	G2	Stage I
TCGA-K7-A5RF	1.72877	0	64	Male	G1	Stage I
TCGA-K7-A5RG	1.42192	0	66	Male	G1	Stage I
TCGA-K7-A6G5	1.40274	0	66	Male	G2	Stage I
TCGA-KR-A7K0	0.178082	1	65	Male	G1	Stage I
TCGA-KR-A7K7	2.60548	0	61	Female	G1	Stage II
TCGA-KR-A7K8	2.48219	0	57	Male	G1	Stage I
TCGA-LG-A6GG	1.06027	0	79	Female	G2	Stage II
TCGA-LG-A9QC	1.16438	0	48	Male	G2	Stage I
TCGA-LG-A9QD	1.00274	0	68	Male	G2	Stage III
TCGA-MI-A75C	0.79726	0	64	Male	G3	Stage I
TCGA-MI-A75E	1.38904	0	61	Male	G2	Stage III
TCGA-MI-A75G	1.91233	0	63	Male	G2	Stage II
TCGA-MR-A520	0.627397	0	58	Male	G1	Stage I
TCGA-MR-A8JO	0.90411	0	34	Male	G3	Stage I
TCGA-NI-A4U2	4.90685	1	71	Male	G1	Stage III
TCGA-NI-A8LF	2.18904	0	74	Male	G3	Stage I
TCGA-O8-A75V	1.47397	0	54	Male	G2	Stage I
TCGA-PD-A5DF	1.75068	1	58	Female	G2	Stage III
TCGA-QA-A7B7	0.257534	0	48	Male	G2	Stage II
TCGA-RC-A6M4	0.060274	0	74	Female	G2	Stage III
TCGA-RC-A6M5	0.0410959	0	20	Female	G2	Stage IV
TCGA-RC-A6M6	0.0246575	0	75	Male	G3	Stage II
TCGA-RC-A7S9	1.75342	0	47	Female	G3	Stage I
TCGA-RC-A7SB	1.61096	0	53	Male	G2	Stage II
TCGA-RC-A7SF	1.5863	0	66	Male	G2	Stage I
TCGA-RC-A7SH	1.28219	0	42	Male	G3	Stage II
TCGA-RC-A7SK	1.29315	0	59	Male	G3	Stage I
TCGA-RG-A7D4	3.00822	0	69	Male	G2	Stage II
TCGA-UB-A7MB	1.64658	0	24	Male	G3	Stage II
TCGA-UB-A7MC	1.36986	0	59	Male	G3	Stage III
TCGA-UB-A7MD	0.142466	1	67	Male	G3	Stage I
TCGA-UB-A7ME	1.33151	0	51	Male	G2	Stage I
TCGA-UB-A7MF	0.586301	1	56	Male	G2	Stage III
TCGA-UB-AA0U	0.89589	0	60	Male	G2	Stage II
TCGA-UB-AA0V	0.860274	0	69	Female	G1	Stage I
TCGA-WQ-AB4B	1.08219	0	62	Male	G2	Stage II
TCGA-WX-AA44	1.68493	0	64	Female	G3	Stage I
TCGA-WX-AA46	2.07123	0	61	Male	G1	Stage II
TCGA-WX-AA47	1.52329	1	33	Female	G2	Stage III
TCGA-XR-A8TC	3.66849	0	43	Female	G2	Stage I
TCGA-XR-A8TD	2.82192	0	49	Female	G3	Stage III
TCGA-XR-A8TE	2.53425	0	16	Male	G1	Stage III
TCGA-XR-A8TF	1.89863	1	74	Male	G1	Stage I
TCGA-XR-A8TG	2.46027	0	58	Male	G2	Stage I
TCGA-YA-A8S7	1.12877	1	68	Male	G3	Stage III
TCGA-ZS-A9CD	3.79726	1	73	Male	G2	Stage II
TCGA-ZS-A9CE	3.4	0	79	Female	G1	Stage II
TCGA-ZS-A9CF	6.60822	0	64	Male	G2	Stage II
TCGA-ZS-A9CG	0.934247	0	55	Male	G2	Stage II

## Sheet: ICGC
id	futime	fustat	Age	Gender	Grade	Stage
DO227643	1260	0	79	Female	G3	Stage Ⅱ
DO227801	660	0	77	Male	G2	Stage Ⅰ
DO23508	390	0	79	Male	G2	Stage Ⅱ
DO23509	780	1	60	Female	G2	Stage Ⅲ
DO23510	870	0	80	Male	G3	Stage Ⅱ
DO23511	180	1	83	Male	G3	Stage Ⅲ
DO23512	1260	0	60	Female	G2	Stage Ⅰ
DO23513	1200	0	76	Female	G2	Stage Ⅲ
DO23514	1290	0	64	Female	G2	Stage Ⅱ
DO23515	1230	0	71	Female	G3	Stage Ⅱ
DO23516	20	1	69	Female	G2	Stage Ⅲ
DO23517	1200	0	62	Female	G1	Stage Ⅱ
DO23518	1320	0	67	Female	G2	Stage Ⅱ
DO23519	630	0	65	Female	G3	Stage Ⅲ
DO23521	1110	0	63	Female	G2	Stage Ⅲ
DO23523	1080	0	52	Female	G2	Stage Ⅲ
DO23524	1050	0	71	Male	G2	Stage Ⅱ
DO23525	1050	0	71	Female	G3	Stage Ⅳ
DO23526	1050	0	66	Female	G3	Stage Ⅲ
DO23527	1050	0	72	Female	G2	Stage Ⅰ
DO23528	1020	0	45	Male	G2	Stage Ⅱ
DO23529	930	0	72	Female	G2	Stage Ⅳ
DO23530	180	1	53	Female	G2	Stage Ⅳ
DO23531	900	0	78	Male	G2	Stage Ⅲ
DO23532	960	0	71	Male	G2	Stage Ⅰ
DO23533	900	0	61	Female	G3	Stage Ⅱ
DO23534	840	0	60	Female	G2	Stage Ⅱ
DO23535	960	0	67	Female	G1	Stage Ⅰ
DO23536	930	0	56	Female	G1	Stage Ⅱ
DO23537	900	1	79	Female	G3	Stage Ⅱ
DO23538	450	0	67	Female	G1	Stage Ⅱ
DO23539	1110	0	77	Female	G2	Stage Ⅰ
DO23540	750	0	73	Female	G2	Stage Ⅰ
DO23541	930	0	65	Female	G2	Stage Ⅱ
DO23542	960	0	66	Female	G2	Stage Ⅲ
DO23543	1020	0	63	Female	G2	Stage Ⅱ
DO23544	960	0	67	Female	G2	Stage Ⅱ
DO23545	570	1	67	Female	G2	Stage Ⅱ
DO23546	1050	0	63	Female	G2	Stage Ⅱ
DO23547	1020	0	74	Female	G2	Stage Ⅰ
DO23548	840	0	78	Male	G1	Stage Ⅰ
DO23549	990	0	74	Female	G2	Stage Ⅲ
DO23550	990	0	69	Female	G1	Stage Ⅰ
DO23551	150	1	73	Female	G3	Stage Ⅲ
DO23552	810	0	80	Male	G2	Stage Ⅰ
DO45091	1320	1	56	Female	G2	Stage Ⅱ
DO45092	1200	1	62	Female	G3	Stage Ⅳ
DO45093	720	1	71	Female	G3	Stage Ⅱ
DO45094	1650	0	76	Female	G2	Stage Ⅲ
DO45095	1620	0	66	Female	G2	Stage Ⅱ
DO45096	1290	1	69	Female	G2	Stage Ⅱ
DO45097	1620	0	69	Female	G2	Stage Ⅲ
DO45099	1590	0	46	Female	G2	Stage Ⅲ
DO45101	1680	0	63	Female	G1	Stage Ⅱ
DO45103	450	0	47	Female	G2	Stage Ⅲ
DO45105	1680	0	61	Female	G2	Stage Ⅰ
DO45107	1710	0	63	Male	G1	Stage Ⅱ
DO45109	1590	0	63	Female	G2	Stage Ⅱ
DO45111	1590	0	74	Female	G2	Stage Ⅱ
DO45113	1560	0	58	Female	G3	Stage Ⅲ
DO45115	840	0	81	Female	G3	Stage Ⅱ
DO45117	1110	1	73	Male	G3	Stage Ⅱ
DO45119	510	1	74	Female	G3	Stage Ⅲ
DO45121	1530	0	61	Female	G3	Stage Ⅲ
DO45123	570	1	78	Male	G2	Stage Ⅱ
DO45125	1680	0	58	Female	G2	Stage Ⅲ
DO45127	420	1	73	Female	G2	Stage Ⅲ
DO45129	1470	0	61	Female	G2	Stage Ⅲ
DO45131	360	1	53	Female	G3	Stage Ⅳ
DO45133	660	1	64	Female	G2	Stage Ⅲ
DO45135	1410	0	77	Female	G3	Stage Ⅰ
DO45137	1320	0	38	Female	G3	Stage Ⅰ
DO45139	1320	0	63	Female	G3	Stage Ⅲ
DO45141	1320	0	73	Female	G2	Stage Ⅱ
DO45143	1290	0	69	Female	G2	Stage Ⅲ
DO45145	60	1	78	Female	G3	Stage Ⅲ
DO45147	720	1	57	Female	G3	Stage Ⅱ
DO45149	1260	0	70	Male	G2	Stage Ⅱ
DO45153	1380	0	77	Male	G2	Stage Ⅱ
DO45155	2160	0	69	Female	G2	Stage Ⅱ
DO45157	1980	0	62	Female	G1	Stage Ⅱ
DO45159	1470	0	65	Female	G2	Stage Ⅲ
DO45161	540	1	74	Female	G2	Stage Ⅱ
DO45163	960	0	76	Female	G2	Stage Ⅱ
DO45165	690	0	75	Female	G2	Stage Ⅱ
DO45167	1440	1	67	Female	G1	Stage Ⅱ
DO45169	1350	0	74	Female	G2	Stage Ⅲ
DO45171	600	0	56	Female	G2	Stage Ⅲ
DO45173	1170	0	63	Female	G3	Stage Ⅲ
DO45175	1140	0	74	Female	G3	Stage Ⅱ
DO45177	1260	0	81	Male	G2	Stage Ⅲ
DO45179	600	0	78	Male	G2	Stage Ⅱ
DO45181	1200	0	84	Male	G2	Stage Ⅱ
DO45183	570	1	72	Male	G2	Stage Ⅱ
DO45185	600	0	89	Female	G2	Stage Ⅱ
DO45187	1260	0	32	Male	G2	Stage Ⅰ
DO45189	1200	0	85	Male	G2	Stage Ⅱ
DO45191	1200	0	61	Male	G2	Stage Ⅱ
DO45193	120	1	68	Male	G2	Stage Ⅳ
DO45197	1170	0	51	Female	G3	Stage Ⅱ
DO45199	1350	0	86	Male	G2	Stage Ⅱ
DO45201	900	0	49	Female	G1	Stage Ⅰ
DO45203	1170	0	71	Male	G2	Stage Ⅱ
DO45205	90	1	67	Male	G2	Stage Ⅱ
DO45207	1050	0	68	Female	G1	Stage Ⅰ
DO45211	240	0	76	Female	G2	Stage Ⅲ
DO45213	1200	0	58	Female	G2	Stage Ⅰ
DO45215	1170	0	65	Female	G2	Stage Ⅱ
DO45217	270	1	69	Male	G3	Stage Ⅲ
DO45219	1080	0	78	Female	G2	Stage Ⅱ
DO45221	390	1	75	Male	G3	Stage Ⅳ
DO45223	1020	0	67	Female	G2	Stage Ⅳ
DO45225	1050	0	69	Female	G1	Stage Ⅰ
DO45227	1020	0	57	Male	G2	Stage Ⅱ
DO45229	990	0	74	Female	G2	Stage Ⅰ
DO45233	900	0	83	Female	G2	Stage Ⅲ
DO45235	900	0	68	Male	G2	Stage Ⅰ
DO45237	900	0	58	Female	G2	Stage Ⅱ
DO45239	870	0	42	Female	G2	Stage Ⅱ
DO45241	1080	0	49	Female	G2	Stage Ⅰ
DO45247	210	0	31	Male	G2	Stage Ⅱ
DO45253	870	0	50	Female	G2	Stage Ⅱ
DO45255	720	0	81	Female	G3	Stage Ⅲ
DO45257	810	0	46	Female	G2	Stage Ⅲ
DO45261	990	0	74	Female	G2	Stage Ⅲ
DO45263	270	1	67	Female	G2	Stage Ⅲ
DO45265	1020	0	73	Female	G3	Stage Ⅲ
DO45267	570	1	73	Female	G3	Stage Ⅲ
DO45269	750	0	59	Female	G3	Stage Ⅲ
DO45273	480	0	62	Female	G2	Stage Ⅱ
DO45277	600	0	64	Female	G2	Stage Ⅲ
DO45281	750	0	83	Female	G2	Stage Ⅳ
DO48672	450	0	81	Female	G2	Stage Ⅱ
DO48674	1260	0	80	Female	G2	Stage Ⅱ
DO48677	1140	0	58	Female	G2	Stage Ⅲ
DO48679	1200	0	72	Female	G2	Stage Ⅱ
DO48681	900	0	57	Female	G2	Stage Ⅱ
DO48682	120	1	72	Male	G3	Stage Ⅲ
DO48693	900	0	71	Female	G2	Stage Ⅱ
DO48695	720	0	77	Female	G2	Stage Ⅱ
DO48697	810	1	64	Male	G3	Stage Ⅱ
DO48700	810	0	78	Male	G2	Stage Ⅱ
DO48701	780	0	78	Female	G3	Stage Ⅱ
DO48704	750	0	68	Male	G3	Stage Ⅲ
DO48706	870	0	72	Female	G2	Stage Ⅱ
DO48712	810	0	50	Female	G2	Stage Ⅱ
DO48715	690	1	58	Male	G2	Stage Ⅱ
DO48716	720	0	71	Female	G2	Stage Ⅱ
DO48717	180	1	54	Female	G2	Stage Ⅳ
DO48719	690	0	80	Female	G3	Stage Ⅱ
DO48720	570	0	62	Male	G3	Stage Ⅱ
DO48721	900	0	58	Male	G2	Stage Ⅰ
DO48723	600	0	73	Female	G3	Stage Ⅰ
DO48725	780	0	66	Female	G2	Stage Ⅰ
DO48727	390	1	81	Male	G2	Stage Ⅱ
DO48728	150	0	74	Male	G3	Stage Ⅱ
DO48730	630	0	73	Male	G2	Stage Ⅱ
DO48732	630	0	73	Female	G2	Stage Ⅲ
DO48733	600	0	72	Female	G2	Stage Ⅱ
DO48736	600	0	76	Male	G2	Stage Ⅰ
DO48737	720	0	52	Female	G3	Stage Ⅰ
DO48741	240	0	64	Female	G2	Stage Ⅲ
DO48742	600	0	76	Female	G1	Stage Ⅱ
DO48743	570	0	69	Male	G2	Stage Ⅱ
DO48746	570	0	76	Female	G1	Stage Ⅲ
DO48747	540	0	62	Female	G3	Stage Ⅲ
DO48751	480	1	68	Female	G3	Stage Ⅱ
DO48757	480	0	68	Male	G2	Stage Ⅲ
DO48759	720	0	73	Female	G1	Stage Ⅲ
DO48760	690	0	70	Male	G1	Stage Ⅱ
DO48761	870	0	55	Female	G1	Stage Ⅱ
DO50774	720	0	68	Male	G2	Stage Ⅱ
DO50776	690	0	75	Female	G2	Stage Ⅰ
DO50778	630	0	60	Female	G3	Stage Ⅳ
DO50783	480	0	62	Female	G2	Stage Ⅲ
DO50787	480	0	63	Female	G2	Stage Ⅲ
DO50789	570	0	73	Male	G3	Stage Ⅱ
DO50791	480	1	79	Male	G3	Stage Ⅰ
DO50793	540	0	76	Female	G3	Stage Ⅳ
DO50798	30	1	77	Female	G2	Stage Ⅲ
DO50799	540	0	66	Male	G3	Stage Ⅱ
DO50800	510	0	74	Female	G2	Stage Ⅱ
DO50802	930	0	49	Female	G2	Stage Ⅱ
DO50803	540	0	62	Male	G2	Stage Ⅰ
DO50804	720	0	81	Female	G1	Stage Ⅱ
DO50805	690	0	72	Female	G3	Stage Ⅱ
DO50806	540	0	70	Female	G3	Stage Ⅳ
DO50807	540	0	67	Female	G2	Stage Ⅰ
DO50808	570	0	68	Female	G3	Stage Ⅱ
DO50809	720	1	56	Female	G2	Stage Ⅲ
DO50811	450	0	62	Female	G2	Stage Ⅰ
DO50813	420	0	56	Female	G2	Stage Ⅱ
DO50814	420	0	83	Female	G2	Stage Ⅲ
DO50815	150	0	62	Female	G3	Stage Ⅲ
DO50816	390	0	63	Female	G2	Stage Ⅱ
DO50817	390	0	75	Female	G2	Stage Ⅱ
DO50818	510	0	65	Female	G2	Stage Ⅱ
DO50819	510	0	72	Male	G2	Stage Ⅱ
DO50820	510	0	77	Male	G1	Stage Ⅲ
DO50822	510	0	66	Female	G2	Stage Ⅱ
DO50825	390	0	70	Female	G2	Stage Ⅱ
DO50829	570	0	78	Female	G2	Stage Ⅲ
DO50832	90	0	73	Female	G2	Stage Ⅲ
DO50839	330	0	47	Male	G2	Stage Ⅲ
DO50840	330	0	49	Female	G3	Stage Ⅱ
DO50844	300	0	75	Female	G3	Stage Ⅳ
DO50845	210	0	72	Female	G2	Stage Ⅲ
DO50850	720	0	74	Female	G2	Stage Ⅲ
DO50855	570	0	47	Female	G2	Stage Ⅱ
DO50857	210	0	72	Female	G2	Stage Ⅱ
DO50859	180	0	77	Female	G3	Stage Ⅱ

## Sheet: GEO
Affy_GSM	Gender	Age	Main Tumor Size (>/<=5 cm)	TNM staging	BCLC staging	CLIP staging	AFP (>/<=300ng/ml)	Survival status	Survival months
GSM363205	M	70	small	I	0	0	high	0	58
GSM363115	M	74	small	I	A	0	low	0	66.6
GSM362970	M	39	small	I	0	0	low	0	67.3
GSM363354	M	66	large	I	A	1	high	1	10.4
GSM363039	M	54	large	I	A	0	low	0	52.8
GSM363209	F	45	small	I	A	1	high	0	60.8
GSM363344	F	52	small	II	A	0	low	0	38.7
GSM363271	M	52	large	IIIC	C	0	low	0	28.7
GSM363404	M	46	large	IIIA	C	4	high	1	12
GSM363217	M	58	small	IIIC	C	1	low	0	54.5
GSM363053	F	57	small	I	A	0	low	0	57
GSM363295	M	63	large	I	C	3	high	0	54.9
GSM363272	M	65	large	II	A	2	high	0	56.3
GSM363164	F	27	small	I	A	1	high	0	55.2
GSM362965	M	57	large	II	A	0	low	0	66.6
GSM363126	M	65	large	IIIB	A	1	high	0	59.5
GSM363082	M	64	small	II	0	0	low	0	57
GSM363176	F	65	small	I	A	0	low	0	50.7
GSM363099	M	50	large	III	B	2	high	1	30.9
GSM363316	F	35	small	I	A	1	high	0	54.7
GSM363178	M	42	small	II	A	0	low	0	57.3
GSM363343	F	30	small	I	A	1	high	0	65.1
GSM363033	M	63	small	I	A	1	high	1	36.4
GSM363055	F	55	large	I	A	1	high	0	7.3
GSM363100	M	56	large	IIIB	C	4	high	1	3.4
GSM363249	F	60	small	II	A	1	high	0	59.2
GSM362952	M	61	small	I	A	1	high	0	54.3
GSM363130	M	72	large	II	A	0	low	0	61.8
GSM363149	M	53	large	I	A	0	low	0	14.4
GSM363337	F	53	small	I	A	1	high	0	65.5
GSM363031	M	58	small	II	A	0	low	0	52.8
GSM363166	M	59	large	IIIB	A	1	high	0	53.8
GSM363032	M	52	large	IIIB	A	1	high	0	24.9
GSM363072	M	49	small	I	A	0	low	0	10.4
GSM363289	M	46	small	I	A	1	high	0	54.2
GSM363296	F	52	small	II	A	2	high	1	27.5
GSM363235	M	41	large	III	B	2	high	0	32.8
GSM362958	M	56	large	II	A	0	low	1	28.2
GSM363366	M	73	large	I	A	0	low	0	52.3
GSM363311	M	77	large	II	A	0	low	0	19
GSM363071	M	35	large	IIIB	C	3	high	1	13.8
GSM363329	M	56	small	I	A	0	low	0	53.2
GSM363200	M	26	small	II	A	1	high	1	23.9
GSM362984	M	49	small	II	A	0	low	0	51.4
GSM363037	M	54	small	I	A	0	low	0	61.2
GSM363362	M	53	small	II	A	0	low	1	5.8
GSM363357	F	47	large	II	A	0	low	1	8.8
GSM363080	M	49	large	IIIB	C	5	high	1	2.3
GSM363125	M	43	large	II	A	1	high	1	16.5
GSM363106	M	53	large	IIIA	C	2	high	1	14.6
GSM362988	F	52	small	I	0	1	high	0	51.1
GSM363107	F	71	small	I	A	1	high	1	7
GSM363355	M	53	small	II	A	0	low	1	9.1
GSM363087	M	40	small	I	A	1	high	0	54
GSM363268	M	56	small	I	A	1	high	0	56
GSM363015	M	39	large	I	A	1	high	0	59.7
GSM363014	M	61	small	I	A	0	low	0	60.7
GSM363364	M	49	small	I	A	0	low	1	27.1
GSM363034	F	30	small	I	A	0	low	1	45.9
GSM363078	M	47	small	IIIB	A	0	low	1	57.9
GSM363202	M	33	small	I	A	0	low	0	60
GSM363332	M	54	large	I	A	1	high	1	12.6
GSM363313	M	71	large	II	A	0	low	0	36.6
GSM363017	M	50	large	IIIB	B	2	low	1	12.7
GSM363294	M	25	small	II	A	2	high	0	62.6
GSM363330	M	50	large	I	A	0	low	1	12.6
GSM363360	M	71	small	I	A	0	high	0	53.3
GSM363008	F	50	small	II	B	1	low	0	58.4
GSM363143	F	48	small	II	0	0	low	1	32.6
GSM363127	M	55	small	II	A	1	high	1	22.2
GSM363102	M	49	large	II	A	0	low	1	37.9
GSM363151	F	70	small	II	A	1	low	0	67.1
GSM712542	M	61	small	IIIA	C	2	high	1	7.5
GSM363335	M	45	small	I	A	0	low	0	59.4
GSM363350	M	43	large	I	A	1	high	0	62.9
GSM363386	M	61	large	IIIA	C	2	high	1	10
GSM363207	M	53	large	I	A	1	high	1	53.3
GSM362986	M	55	small	II	0	0	low	0	64.5
GSM362972	M	45	small	I	0	0	low	0	66
GSM363186	M	45	small	II	A	0	low	1	7.6
GSM363288	M	56	small	I	A	1	high	0	60.3
GSM363016	M	44	large	IIIA	B	1	low	0	2
GSM363341	M	32	large	II	A	1	high	0	65.4
GSM363243	M	69	small	I	A	1	low	0	55.8
GSM363168	M	51	large	IIIA	B	1	low	0	53.8
GSM363051	M	43	large	IIIA	B	2	high	0	20.6
GSM363098	M	60	small	II	0	1	high	0	56.9
GSM363314	F	48	small	II	A	2	high	0	57.1
GSM363170	M	59	small	I	0	0	low	0	53.3
GSM363029	M	48	small	I	A	0	low	0	51.3
GSM362950	M	45	small	I	A	1	high	0	57.5
GSM363298	M	52	small	I	A	1	high	0	53.6
GSM363265	M	41	small	II	A	1	low	0	65.1
GSM363038	M	41	small	II	A	0	low	1	15.1
GSM363309	M	34	small	II	0	0	low	1	53
GSM363104	M	59	small	I	A	0	low	1	35.9
GSM363393	M	46	small	IIIA	C	3	high	1	4
GSM363011	M	57	small	II	B	2	high	1	17.6
GSM363180	M	52	large	IIIA	B	2	high	1	47.1
GSM363048	M	50	large	IIIA	B	2	high	1	20.3
GSM363077	M	40	small	I	0	1	high	0	52.7
GSM363144	M	72	small	I	A	0	low	0	51.1
GSM363336	M	63	small	I	A	0	low	1	8
GSM363073	M	41	small	II	A	1	high	1	26.5
GSM362977	M	41	large	I	A	0	low	0	66.3
GSM363012	M	61	large	I	A	0	low	1	4.5
GSM363328	M	63	large	I	A	0	high	1	12
GSM363215	M	48	small	I	0	1	high	0	18.6
GSM363400	M	58	small	II	A	0	low	0	55.6
GSM363358	M	56	small	II	A	0	low	0	53.9
GSM363391	M	55	small	II	0	0	low	0	57.3
GSM363333	M	48	large	II	A	1	high	1	13.5
GSM363083	M	45	small	I	0	0	low	0	53.3
GSM363218	M	48	large	IIIB	A	3	high	1	15.2
GSM363086	M	44	small	II	A	2	high	0	60.5
GSM363267	M	54	small	II	A	1	low	1	47.9
GSM362994	M	49	small	II	A	1	high	0	54.8
GSM363224	M	70	small	I	A	1	high	0	57.9
GSM363269	M	55	small	I	A	0	low	1	52.7
GSM363297	F	58	large	IIIB	A	1	high	0	3
GSM363182	M	50	small	I	A	0	low	0	52.7
GSM363109	M	50	small	II	A	0	low	0	55.2
GSM363054	M	51	large	II	A	0	low	0	53.8
GSM363075	F	54	large	IIIB	C	1	low	1	18
GSM363129	M	34	large	IIIA	C	3	high	1	3.5
GSM363101	M	50	small	I	A	1	high	0	56.3
GSM363378	M	47	small	I	A	0	low	1	31.9
GSM363232	M	49	small	II	A	0	low	0	57.9
GSM362993	M	50	small	I	A	1	high	0	3.8
GSM363150	M	68	large	II	A	1	high	1	3.3
GSM363142	M	28	small	II	B	2	high	1	46.1
GSM363013	M	58	small	II	A	1	high	1	7.7
GSM363331	F	54	large	I	A	1	high	1	36.5
GSM363128	M	36	small	II	A	0	low	1	30.1
GSM363315	M	43	small	II	A	1	high	0	65.4
GSM363384	M	43	small	II	A	0	low	1	51.6
GSM363147	M	44	small	II	B	1	low	1	28.7
GSM362947	M	67	large	IIIA	B	1	low	1	59.2
GSM363081	M	34	large	IIIA	C	1	low	1	5.2
GSM363052	M	46	large	IIIA	C	2	low	1	14.3
GSM362966	M	58	small	I	A	0	low	0	66.1
GSM363169	M	45	large	IIIA	B	2	high	0	39.4
GSM363085	M	49	large	IIIA	B	2	high	1	54.8
GSM363388	F	58	small	I	0	0	low	0	57.3
GSM363196	M	42	small	I	A	0	low	0	57.7
GSM362948	M	37	small	II	A	1	low	0	61.4
GSM363266	M	35	small	IIIB	C	1	low	1	2.5
GSM363326	M	37	small	I	A	2	high	1	37.2
GSM363230	M	40	large	II	A	0	low	0	4.8
GSM363237	M	69	large	I	A	1	high	0	57.5
GSM363204	M	53	large	IIIA	C	2	high	1	14.1
GSM363264	M	43	large	III	B	1	low	1	17.8
GSM363312	F	53	small	II	A	0	low	0	55.3
GSM363123	M	48	large	II	A	0	low	0	42.7
GSM363245	M	47	large	IIIA	C	3	high	0	57.5
GSM363192	M	50	small	I	0	0	low	0	52.2
GSM363291	M	54	small	I	A	0	low	1	50.1
GSM363273	M	56	small	I	A	0	low	0	58
GSM363148	M	64	small	II	A	2	high	0	52.4
GSM363263	M	39	large	IIIA	C	2	high	1	3
GSM362978	M	61	small	I	A	1	low	1	28.8
GSM363056	F	59	small	II	B	2	high	1	19.2
GSM363310	M	41	small	II	A	0	low	1	23.5
GSM363275	F	67	small	IIIB	A	1	low	0	59.8
GSM363352	M	51	small	II	A	1	high	1	16.2
GSM363293	M	54	small	I	A	0	low	0	61.5
GSM363292	M	53	small	I	A	0	low	0	59.9
GSM363211	M	61	large	IIIA	C	3	high	1	8.9
GSM362954	M	40	small	I	A	0	low	0	5.5
GSM363339	F	49	small	II	0	1	high	0	65.4
GSM363270	M	58	small	II	B	1	low	1	21.3
GSM363371	F	69	small	I	A	0	low	0	66.3
GSM363009	M	50	large	II	A	1	high	0	58.9
GSM362982	M	39	small	I	A	0	low	0	64.6
GSM363188	M	35	small	II	A	0	low	0	57.3
GSM363251	M	47	small	IIIA	C	2	low	1	19.6
GSM363057	M	63	small	II	A	1	low	1	60.5
GSM363030	M	58	small	IIIA	A	2	high	1	4.5
GSM363274	M	53	small	II	B	2	high	1	26.9
GSM363146	M	50	large	IIIA	C	2	low	0	54.9
GSM362983	M	32	small	I	A	1	high	0	64.2
GSM363222	M	59	small	I	A	0	low	0	48.4
GSM363074	M	41	small	II	A	0	low	0	57.7
GSM363290	F	63	small	I	0	0	low	0	54.7
GSM362987	M	60	small	II	A	0	low	0	60.4
GSM363035	M	40	large	I	A	0	low	0	56.1
GSM363036	M	65	small	II	A	1	low	1	32.7
GSM363079	M	53	large	IIIA	C	2	high	1	7.8
GSM363317	M	58	small	I	0	1	high	0	62.8
GSM363172	M	67	small	II	A	0	low	1	6.7
GSM363084	M	67	large	I	A	0	low	0	62.6
GSM363239	M	54	small	II	A	1	low	1	42.2
GSM363121	M	39	small	IIIC	C	3	high	0	51.2
GSM363108	M	49	large	II	A	0	low	0	48.8
GSM363152	M	39	large	IIIA	C	4	high	1	8.3
GSM363105	M	36	small	II	A	1	low	0	9.5
GSM363327	M	52	small	I	A	0	low	0	60.1
GSM363194	M	44	small	II	B	2	high	0	4.5
GSM363346	M	51	large	IIIB	A	0	low	1	14.3
GSM363174	M	48	small	II	A	2	high	0	67.1
GSM362976	M	50	small	I	A	0	low	0	67
GSM363190	M	41	small	II	A	1	low	0	4.8
GSM363069	M	34	large	IIIA	C	2	high	1	13.6
GSM363247	M	44	small	I	A	0	low	0	52.9
GSM363076	M	35	large	IIIB	C	3	high	1	23
GSM363376	M	62	small	I	0	0	low	0	61.5
GSM362959	M	45	small	I	A	1	high	1	9.5
GSM363226	M	54	large	IIIC	C	0	low	0	60.4
GSM363220	M	59	large	IIIA	B	2	high	0	54.2
GSM362964	M	50	small	I	A	0	low	0	67.4
GSM363348	M	41	small	I	A	0	low	0	14.3
GSM363213	M	50	large	II	C	0	low	0	57.6
GSM363198	M	41	small	I	A	0	low	0	57.9
GSM363184	M	34	large	IIIA	B	1	low	0	16.3
GSM362960	M	21	small	II	A	1	high	0	66.1
GSM363145	M	43	small	I	A	0	low	1	33
GSM363050	M	32	small	II	B	2	high	0	54.2
GSM363241	M	55	large	I	A	1	high	0	54.2
GSM363122	M	49	small	I	A	0	low	0	55.4
GSM362971	M	52	small	I	A	2	high	1	48.1
